# Supplementary material
Source: PubMed Central journal article supplement (PMC8555857)
Supplement: NIHMS1591338-supplement-1.pdf [file NIHMS1591338-supplement-1.pdf]

1 Online Supplemental Table 1. Balance analysis for randomly assigned left/right position and 3  
2 label variations.

| Null hypothesis                                                          | Product category  | Degrees of freedom | Chi-square | p-value <sup>a</sup> |
|--------------------------------------------------------------------------|-------------------|--------------------|------------|----------------------|
| No association between age category and 3 cereal label variations.       | Cereal (n=1017)   | 10                 | 13.85      | 0.180                |
|                                                                          | Crackers (n=1010) | 10                 | 14.04      | 0.171                |
|                                                                          | Bread (n=1015)    | 10                 | 1.40       | 0.999                |
| No association between age category and left/right position.             | Cereal (n=1017)   | 5                  | 2.53       | 0.772                |
|                                                                          | Crackers (n=1010) | 5                  | 2.16       | 0.827                |
|                                                                          | Bread (n=1015)    | 5                  | 7.98       | 0.157                |
| No association between race category and 3 cereal label variations.      | Cereal (n=1015)   | 4                  | 2.47       | 0.651                |
|                                                                          | Crackers (n=1008) | 4                  | 2.89       | 0.576                |
|                                                                          | Bread (n=1013)    | 4                  | 5.97       | 0.202                |
| No association between race category and left/right position.            | Cereal (n=1015)   | 2                  | 0.03       | 0.988                |
|                                                                          | Crackers (n=1008) | 2                  | 0.67       | 0.716                |
|                                                                          | Bread (n=1013)    | 2                  | 1.82       | 0.402                |
| No association between education category and 3 cereal label variations. | Cereal (n=1017)   | 6                  | 3.74       | 0.711                |
|                                                                          | Crackers (n=1010) | 6                  | 2.65       | 0.851                |
|                                                                          | Bread (n=1015)    | 6                  | 10.30      | 0.112                |
| No association between education category and left/right position.       | Cereal (n=1017)   | 3                  | 5.80       | 0.122                |
|                                                                          | Crackers (n=1010) | 3                  | 0.86       | 0.834                |
|                                                                          | Bread (n=1015)    | 3                  | 4.46       | 0.216                |

3 <sup>a</sup>p-value < 0.05 would indicate lack of balance in random assignment.

- 4 Online Supplemental Table 2. Relative frequency of correct response (unlabeled option was healthier) and incorrect response (WG
- 5 labeled option was healthier or both options were equally healthy), for the full sample and for 3 variations on the product labels<sup>a</sup>

|   |                          |           | Frequency          | SE  | Frequency                         | SE  | Frequency                       | SE  | Frequency                     | SE  |
|---|--------------------------|-----------|--------------------|-----|-----------------------------------|-----|---------------------------------|-----|-------------------------------|-----|
|   | <b>Cereal (n=1030)</b>   |           | <b>Full Sample</b> |     | <b>1 Made with WG<br/>(n=310)</b> |     | <b>2 Multigrain<br/>(n=376)</b> |     | <b>3 WG Stamp<br/>(n=344)</b> |     |
| 1 | Unlabeled                | Correct   | 68.9               | 1.4 | 70.6                              | 2.6 | 66.0                            | 2.4 | 70.6                          | 2.5 |
| 2 | Equally Healthy          | Incorrect | 19.6               | 1.2 | 15.8                              | 2.1 | 22.1                            | 2.1 | 20.3                          | 2.2 |
| 3 | Labeled                  | Incorrect | 11.5               | 1.0 | 13.5                              | 1.9 | 12.0                            | 1.7 | 9.0                           | 1.5 |
|   | <b>Crackers (n=1016)</b> |           | <b>Full Sample</b> |     | <b>1 Made with WG<br/>(n=334)</b> |     | <b>2 Multigrain<br/>(n=353)</b> |     | <b>3 WG Stamp<br/>(n=329)</b> |     |
| 1 | Unlabeled                | Correct   | 65.3               | 1.5 | 63.5                              | 2.6 | 61.8                            | 2.6 | 70.8                          | 2.5 |
| 2 | Equally Healthy          | Incorrect | 22.7               | 1.3 | 22.2                              | 2.3 | 24.9                            | 2.3 | 21.0                          | 2.2 |
| 3 | Labeled                  | Incorrect | 12.0               | 1.0 | 14.4                              | 1.9 | 13.3                            | 1.8 | 8.2                           | 1.5 |
|   | <b>Bread (n=1022)</b>    |           | <b>Full Sample</b> |     | <b>1 Multigrain<br/>(n=344)</b>   |     | <b>2 Wheat (n=347)</b>          |     | <b>3 WG Stamp<br/>(n=331)</b> |     |
| 1 | Unlabeled                | Correct   | 53.0               | 1.6 | 54.1                              | 2.7 | 53.0                            | 2.7 | 52.0                          | 2.8 |

|   |                 |           |      |     |      |     |      |     |      |     |
|---|-----------------|-----------|------|-----|------|-----|------|-----|------|-----|
| 2 | Equally Healthy | Incorrect | 20.7 | 1.3 | 18.3 | 2.1 | 20.2 | 2.2 | 23.6 | 2.3 |
| 3 | Labeled         | Incorrect | 26.3 | 1.4 | 27.6 | 2.4 | 26.8 | 2.4 | 24.5 | 2.4 |

6    <sup>a</sup>Images for the hypothetical product comparison are in Online Supplemental Figure 1.

Online Supplemental Table 3. Ordered logit estimates for propensity to respond incorrectly when comparing hypothetical product pairs for which the unlabeled option was healthier (reduced model without a question about “difficult to determine” WG content).<sup>a</sup>

|                                         | Cereal            |       | Crackers          |       | Bread             |       |
|-----------------------------------------|-------------------|-------|-------------------|-------|-------------------|-------|
| Explanatory Var. <sup>b</sup>           | Coef <sup>d</sup> | SE    | Coef <sup>d</sup> | SE    | Coef <sup>d</sup> | SE    |
| Label variation 1 <sup>c</sup>          | (comparison)      |       | (comparison)      |       | (comparison)      |       |
| Label variation 2                       | 0.154             | 0.169 | 0.068             | 0.160 | -0.002            | 0.151 |
| Label variation 3                       | -0.050            | 0.176 | -0.343            | 0.168 | 0.065             | 0.152 |
|                                         |                   |       |                   |       |                   |       |
| 18 to 24 years old                      | (comparison)      |       | (comparison)      |       | (comparison)      |       |
| 25 to 34 years old                      | 0.470             | 0.260 | 0.544             | 0.256 | 0.127             | 0.242 |
| 35 to 44 years old                      | 0.368             | 0.260 | 0.357             | 0.256 | -0.001            | 0.240 |
| 45 to 54 years old                      | -0.190            | 0.273 | -0.256            | 0.267 | -0.481            | 0.247 |
| 55 to 64 years old                      | -0.478            | 0.290 | -0.171            | 0.273 | -0.561            | 0.255 |
| Age 65 or more                          | -0.543            | 0.293 | -0.876            | 0.300 | -0.743            | 0.259 |
|                                         |                   |       |                   |       |                   |       |
| Black / Afr.<br>Amer.                   | (comparison)      |       | (comparison)      |       | (comparison)      |       |
| Asian / Pacific<br>Islander and Other   | 0.107             | 0.267 | -0.394            | 0.274 | -0.008            | 0.254 |
| White / Caucasian                       | -0.523            | 0.187 | -0.595            | 0.180 | -0.658            | 0.178 |
|                                         |                   |       |                   |       |                   |       |
| College degree                          | (comparison)      |       | (comparison)      |       | (comparison)      |       |
| Grad / prof.<br>degree                  | 0.161             | 0.229 | 0.167             | 0.221 | 0.356             | 0.203 |
| HS or less                              | 0.546             | 0.178 | 0.450             | 0.176 | 0.757             | 0.163 |
| Some college                            | 0.2010653         | 0.188 | 0.214038          | 0.183 | 0.377096          | 0.170 |
|                                         |                   |       |                   |       |                   |       |
| Cutpoint 1 (Equal<br>versus Unlabeled)  | 0.695             | 0.304 | 0.281             | 0.293 | -0.250            | 0.282 |
| Cutpoint 2<br>(Labeled versus<br>Equal) | 1.992             | 0.312 | 1.729             | 0.300 | 0.722             | 0.283 |
| Obs                                     | 1,015             |       | 1,008             |       | 1,013             |       |

<sup>a</sup>Outcome variable coded 1 (unlabeled), 2 (equally healthy), 3 (WG labeled). <sup>b</sup>See also main ordered logit model in Table 4. An extended model is presented in Online Supplemental Table 4. <sup>c</sup>WG label variations for the cereal and cracker categories: (1) “made with whole grains,” (2) “multigrain,” and (3) a WG stamp; and for the bread category: (1) “multigrain,” (2) “wheat,” and (3) a WG stamp. <sup>d</sup>Coefficient shows effect of each explanatory variable on the log-odds of having the next higher value of the outcome variable (i.e. choosing equally healthy over unlabeled).

17 Online Supplemental Table 4. Ordered logit estimates for propensity to respond incorrectly when  
 18 comparing hypothetical product pairs for which the unlabeled option was healthier (expanded  
 19 model with additional demographic variables).<sup>a</sup>

|                                                    | Cereal            |       | Crackers          |       | Bread             |       |
|----------------------------------------------------|-------------------|-------|-------------------|-------|-------------------|-------|
| Explanatory Var. <sup>b</sup>                      | Coef <sup>d</sup> | SE    | Coef <sup>d</sup> | SE    | Coef <sup>d</sup> | SE    |
| Label variation 1 <sup>c</sup>                     | (comparison)      |       | (comparison)      |       | (comparison)      |       |
| Label variation 2                                  | 0.144             | 0.174 | 0.005             | 0.163 | -0.012            | 0.152 |
| Label variation 3                                  | -0.079            | 0.180 | -0.356            | 0.171 | 0.095             | 0.154 |
|                                                    |                   |       |                   |       |                   |       |
| WG in left position                                | -0.197            | 0.141 | -0.160            | 0.136 | -0.139            | 0.126 |
|                                                    |                   |       |                   |       |                   |       |
| “Difficult to determine” which products contain WG |                   |       |                   |       |                   |       |
| strong disagreement                                | (comparison)      |       | (comparison)      |       | (comparison)      |       |
| some disagreement                                  | -0.627            | 0.267 | -0.308            | 0.247 | -0.007            | 0.222 |
| neither                                            | 0.274             | 0.244 | 0.209             | 0.236 | 0.490             | 0.219 |
| some agreement                                     | 0.266             | 0.249 | 0.269             | 0.240 | 0.246             | 0.222 |
| strong agreement                                   | 0.874             | 0.279 | 0.960             | 0.269 | 0.668             | 0.256 |
|                                                    |                   |       |                   |       |                   |       |
| 18 to 24 years old                                 | (comparison)      |       | (comparison)      |       | (comparison)      |       |
| 25 to 34 years old                                 | 0.452             | 0.266 | 0.477             | 0.261 | 0.050             | 0.246 |
| 35 to 44 years old                                 | 0.336             | 0.266 | 0.308             | 0.260 | -0.045            | 0.243 |
| 45 to 54 years old                                 | -0.195            | 0.282 | -0.269            | 0.273 | -0.534            | 0.252 |
| 55 to 64 years old                                 | -0.402            | 0.298 | -0.190            | 0.279 | -0.527            | 0.260 |
| Age 65 or more                                     | -0.509            | 0.302 | -0.834            | 0.305 | -0.732            | 0.263 |
|                                                    |                   |       |                   |       |                   |       |
| Male                                               | 0.250             | 0.146 | -0.147            | 0.141 | -0.033            | 0.130 |
|                                                    |                   |       |                   |       |                   |       |
| Black / Afr. Amer.                                 | (comparison)      |       | (comparison)      |       | (comparison)      |       |
| Asian / Pacific Islander and Other                 | 0.208             | 0.279 | -0.263            | 0.284 | -0.085            | 0.264 |
| White / Caucasian                                  | -0.387            | 0.199 | -0.341            | 0.190 | -0.600            | 0.186 |
|                                                    |                   |       |                   |       |                   |       |
| Non-Hispanic                                       | 0.028             | 0.222 | 0.160             | 0.221 | -0.310            | 0.200 |
|                                                    |                   |       |                   |       |                   |       |
| College degree                                     |                   |       | (comparison)      |       | (comparison)      |       |

|                                     |       |       |       |       |        |       |
|-------------------------------------|-------|-------|-------|-------|--------|-------|
| Grad / prof. degree                 | 0.038 | 0.237 | 0.112 | 0.227 | 0.356  | 0.208 |
| HS or less                          | 0.503 | 0.182 | 0.412 | 0.178 | 0.711  | 0.165 |
| Some college                        | 0.170 | 0.192 | 0.205 | 0.186 | 0.317  | 0.173 |
|                                     |       |       |       |       |        |       |
| Cutpoint 1 (Equal versus Unlabeled) | 0.922 | 0.431 | 0.575 | 0.417 | -0.351 | 0.392 |
| Cutpoint 2 (Labeled versus Equal)   | 2.271 | 0.438 | 2.058 | 0.424 | 0.630  | 0.392 |
| Obs                                 | 1008  |       | 1001  |       | 1006   |       |

<sup>a</sup>Outcome variable coded 1 (unlabeled), 2 (equally healthy), 3 (WG labeled). <sup>b</sup>See also main ordered logit model in Table 4. An extended model is presented in Online Supplemental Table 4. <sup>c</sup>WG label variations for the cereal and cracker categories: (1) “made with whole grains,” (2) “multigrain,” and (3) a WG stamp; and for the bread category: (1) “multigrain,” (2) “wheat,” and (3) a WG stamp. <sup>d</sup>Coefficient shows effect of each explanatory variable on the log-odds of having the next higher value of the outcome variable (i.e. choosing equally healthy over unlabeled).

28 Online Supplemental Table 5. Whole grain content comprehension questions for actual products  
29 with varying amounts of WG content<sup>a</sup>

|                     |                                                                                                                                                  | Frequency of Respondent Choices (%) |                                                   |                                           |                                     |         |
|---------------------|--------------------------------------------------------------------------------------------------------------------------------------------------|-------------------------------------|---------------------------------------------------|-------------------------------------------|-------------------------------------|---------|
| Product Description | Actual Whole Grain Content                                                                                                                       | “All the grain is whole grain”      | “Half or more than half the grain is whole grain” | “Less than half the grain is whole grain” | "There is little or no whole grain” | “Other” |
| Honey Wheat Bread   | “Less than half” or “little or no” is correct. Whole wheat flour (6th ingredient) is less than unbleached enriched wheat flour (1st ingredient). | 17.89                               | 24.95                                             | 22.44                                     | 30.46                               | 4.26    |
| Multigrain Cracker  | “Less than half” or “little or no” is correct. Whole wheat flour (5th ingredient) is less than enriched wheat flour (1st ingredient).            | 14.33                               | 26.62                                             | 30.40                                     | 25.56                               | 3.10    |

|                                 |                                                                                                                                                         |       |       |       |       |      |
|---------------------------------|---------------------------------------------------------------------------------------------------------------------------------------------------------|-------|-------|-------|-------|------|
| Farmhouse<br>12 Grain<br>Bread  | “Less than half” or<br>“little or no” is<br>correct. Whole wheat<br>flour (3rd ingredient)<br>is less than enriched<br>wheat flour (1st<br>ingredient). | 22.14 | 29.13 | 27.86 | 18.16 | 2.72 |
| Apple<br>Cinnamon<br>Oat Cereal | “Half or more” is<br>correct. WG oats (1st<br>ingredient) is more<br>than corn starch (3rd<br>ingredient).                                              | 45.05 | 36.60 | 11.84 | 4.85  | 1.65 |

30 <sup>a</sup>.Product images are in Figure 1 (may be supplemental).

31 WG, Whole Grain

32

Online Supplemental Table 6. Chi-square hypothesis tests from ordered logit models of correct responses (unlabeled option was healthier) and incorrect responses (WG labeled option was healthier or both options were equally healthy) in hypothetical product comparisons.<sup>a</sup>

| Null hypothesis                                                            | Product category  | Degrees of freedom | Chi-square | p-value |
|----------------------------------------------------------------------------|-------------------|--------------------|------------|---------|
| No association with left/right position                                    | Cereal (n=1030)   | 1                  | 2.45       | 0.118   |
|                                                                            | Crackers (n=1016) | 1                  | 2.73       | 0.099   |
|                                                                            | Bread (n=1022)    | 1                  | 2.54       | 0.111   |
| No association with 3 label variations                                     | Cereal (n=1030)   | 2                  | 1.98       | 0.372   |
|                                                                            | Crackers (n=1016) | 2                  | 7.92       | 0.019   |
|                                                                            | Bread (n=1022)    | 2                  | 0.00       | 0.998   |
| No association with agreement that it is difficult to determine WG content | Cereal (n=1023)   | 4                  | 56.71      | 0.000   |
|                                                                            | Crackers (n=1015) | 4                  | 48.21      | 0.000   |
|                                                                            | Bread (n=1021)    | 4                  | 28.65      | 0.000   |

<sup>a</sup>Images for product comparisons are in Online Supplemental Figure 2. Ordered logit outcome variable coded 1 (unlabeled), 2 (equally healthy), 3 (WG labeled).

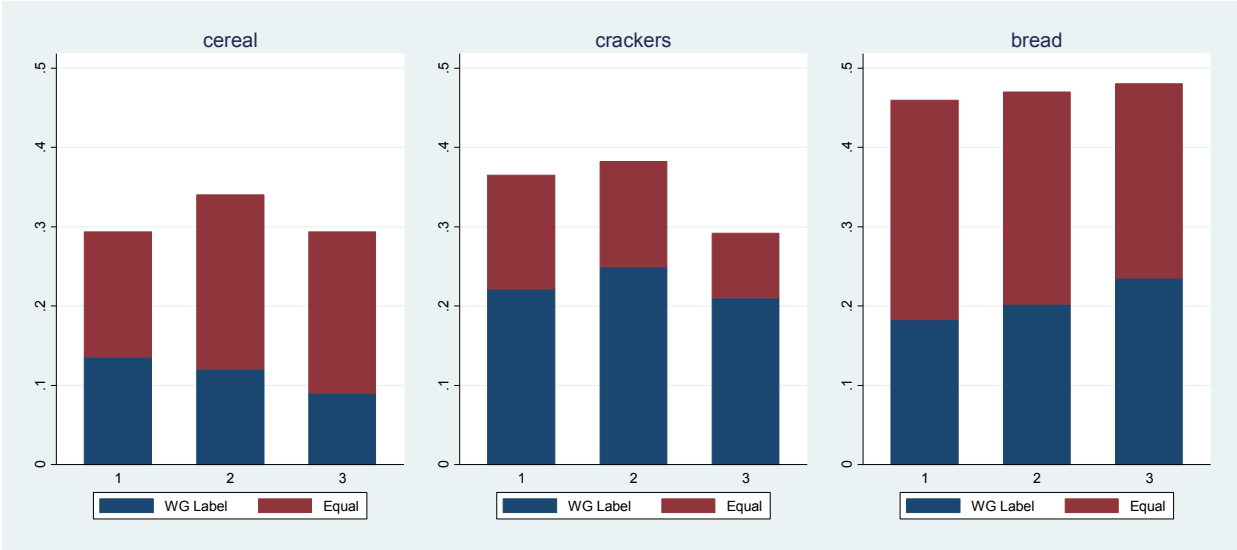

Online Supplemental Figure 1. Relative frequency of incorrect responses (stating that the labeled option was healthier or both options were equally healthy), in trials of hypothetical product pairs for which the unlabeled option was healthier. There were 3 randomly-assigned variations of the label within each of the 3 product categories: cereal (1 Made with WG, 2 Multigrain, 3 WG stamp), crackers (1 Made with WG, 2 Multigrain, 3 WG stamp), and bread (1 Multigrain, 2 Wheat, 3 WG stamp), as shown in Online Supplemental Figure 2. Each respondent received only 1 variation within each product category, as shown in Online Supplemental Figure 3. Standard errors and further details in Online Supplemental Table 1.

15 (a) Cereal<sup>1</sup>

| No Treatment                                                                      | Treatment                                                                         |                                                                                    |                                                                                     |
|-----------------------------------------------------------------------------------|-----------------------------------------------------------------------------------|------------------------------------------------------------------------------------|-------------------------------------------------------------------------------------|
|                                                                                   | 1                                                                                 | 2                                                                                  | 3                                                                                   |
| No claim                                                                          | Stamp                                                                             | Made with whole grains                                                             | Multigrain                                                                          |
| 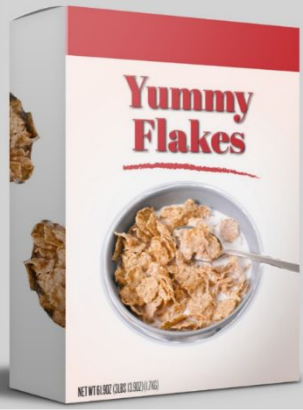 | 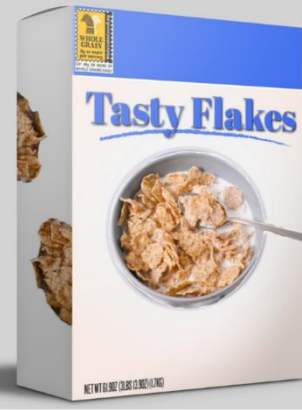 | 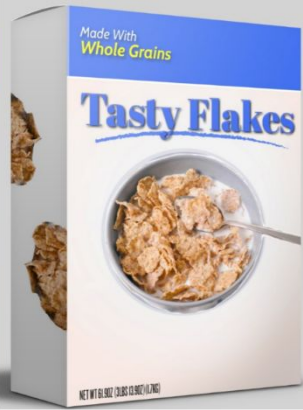 | 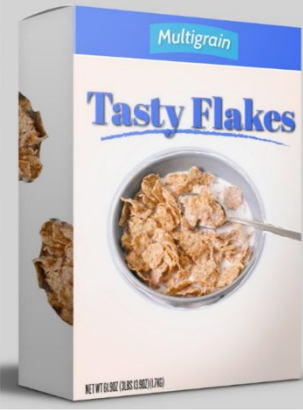 |

|                                       |                                       |                                       |                                       |
|---------------------------------------|---------------------------------------|---------------------------------------|---------------------------------------|
| WG corn is 3 <sup>rd</sup> ingredient | WG corn is 6 <sup>th</sup> ingredient | WG corn is 6 <sup>th</sup> ingredient | WG corn is 6 <sup>th</sup> ingredient |
| Sugar is 5 <sup>th</sup> ingredient   | Sugar is 2 <sup>nd</sup> ingredient   | Sugar is 2 <sup>nd</sup> ingredient   | Sugar is 2 <sup>nd</sup> ingredient   |
| 3g added sugars                       | 13g added sugars                      | 13g added sugars                      | 13g added sugars                      |
| More WG and less sugar                | Less WG, more sugar, and a WG label   |                                       |                                       |

17

18

19

(b) Crackers

| No Treatment                                                                      | Treatment                                                                         |                                                                                    |                                                                                     |
|-----------------------------------------------------------------------------------|-----------------------------------------------------------------------------------|------------------------------------------------------------------------------------|-------------------------------------------------------------------------------------|
|                                                                                   | 1                                                                                 | 2                                                                                  | 3                                                                                   |
| No claim                                                                          | Stamp                                                                             | Made with whole grains                                                             | Multigrain                                                                          |
| 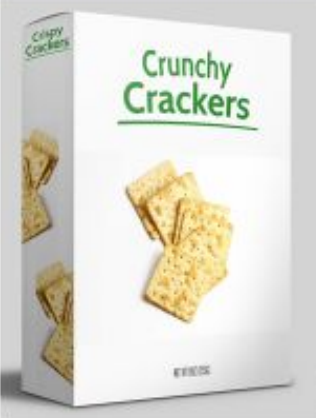 | 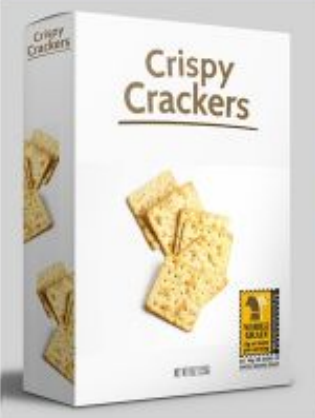 | 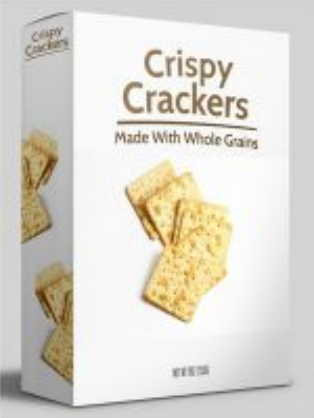 | 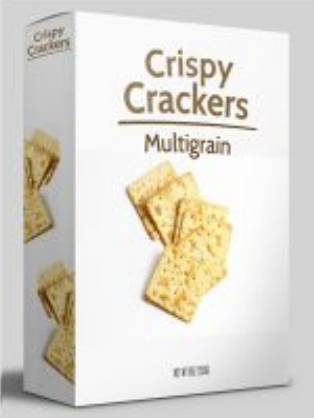 |

|                                                 |                                                 |                                                 |                                                 |
|-------------------------------------------------|-------------------------------------------------|-------------------------------------------------|-------------------------------------------------|
| Whole wheat flour is 4 <sup>th</sup> ingredient | Whole wheat flour is 5 <sup>th</sup> ingredient | Whole wheat flour is 5 <sup>th</sup> ingredient | Whole wheat flour is 5 <sup>th</sup> ingredient |
| Salt is 5 <sup>th</sup> ingredient              | Salt is 3 <sup>rd</sup> ingredient              | Salt is 3 <sup>rd</sup> ingredient              | Salt is 3 <sup>rd</sup> ingredient              |
| 80 mg sodium                                    | 280 mg sodium                                   | 280 mg sodium                                   | 280 mg sodium                                   |
| More WG and less salt                           | Less WG, more salt, and a WG label              |                                                 |                                                 |

(c) Bread

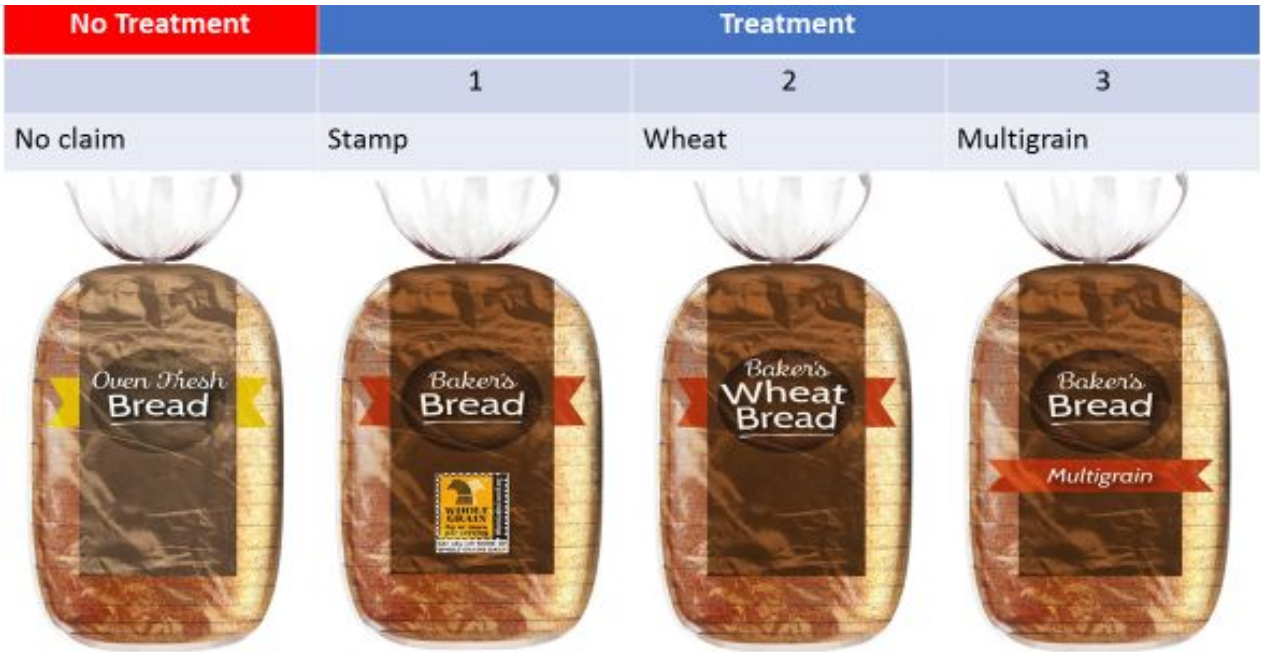

|                                              |                                              |                                              |                                              |
|----------------------------------------------|----------------------------------------------|----------------------------------------------|----------------------------------------------|
| Whole wheat flour 1 <sup>st</sup> ingredient | Whole wheat flour 5 <sup>th</sup> ingredient | Whole wheat flour 5 <sup>th</sup> ingredient | Whole wheat flour 5 <sup>th</sup> ingredient |
| 4g fiber                                     | 2g fiber                                     | 2g fiber                                     | 2g fiber                                     |
| More WG                                      | Less WG and a WG label                       |                                              |                                              |

<sup>1</sup>Each respondent was presented with just 1 of the treatment options.

Online Supplemental Figure 2. Unlabeled (no treatment) and 3 randomly-assigned variations of WG labeled (treatment) images and descriptions, for hypothetical products in 3 product categories (cereal, crackers, bread).

43

Which product is healthier? Select one option below.

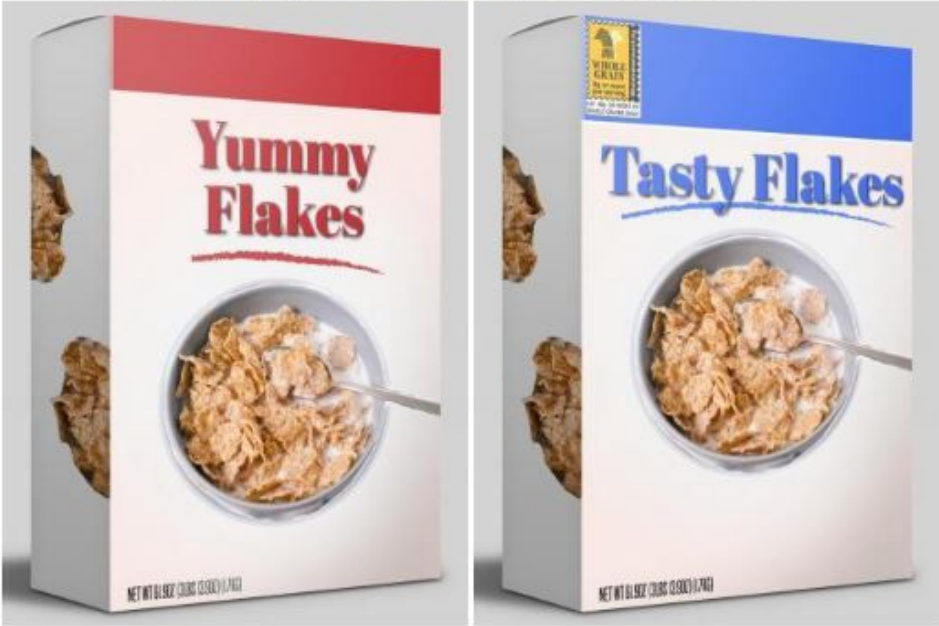

| Nutrition Facts                                                                                                                                                    |             |
|--------------------------------------------------------------------------------------------------------------------------------------------------------------------|-------------|
| 10 servings per container                                                                                                                                          |             |
| Serving size                                                                                                                                                       | 1 cup (31g) |
| Amount Per Serving                                                                                                                                                 |             |
| <b>Calories</b>                                                                                                                                                    | <b>110</b>  |
| % Daily Value*                                                                                                                                                     |             |
| Total Fat 0g                                                                                                                                                       | 0%          |
| Saturated Fat 0g                                                                                                                                                   | 0%          |
| Trans Fat 0g                                                                                                                                                       |             |
| Cholesterol 0mg                                                                                                                                                    | 0%          |
| Sodium 150mg                                                                                                                                                       | 7%          |
| Total Carbohydrate 26g                                                                                                                                             | 9%          |
| Dietary Fiber 1g                                                                                                                                                   | 4%          |
| Total Sugars 3g                                                                                                                                                    |             |
| Includes 3g Added Sugars                                                                                                                                           | 6%          |
| Protein 2g                                                                                                                                                         | 4%          |
| Not a significant source of vitamin D, calcium, iron, and potassium                                                                                                |             |
| *The % Daily Value (DV) tells you how much a nutrient in a serving of food contributes to a daily diet. 2,000 calories a day is used for general nutrition advice. |             |

Ingredients: wheat, rice, whole grain corn, brown rice syrup, sugar, corn starch, salt, malt flavor, vitamins and minerals

| Nutrition Facts                                                                                                                                                    |             |
|--------------------------------------------------------------------------------------------------------------------------------------------------------------------|-------------|
| 10 servings per container                                                                                                                                          |             |
| Serving size                                                                                                                                                       | 1 cup (31g) |
| Amount Per Serving                                                                                                                                                 |             |
| <b>Calories</b>                                                                                                                                                    | <b>110</b>  |
| % Daily Value*                                                                                                                                                     |             |
| Total Fat 0g                                                                                                                                                       | 0%          |
| Saturated Fat 0g                                                                                                                                                   | 0%          |
| Trans Fat 0g                                                                                                                                                       |             |
| Cholesterol 0mg                                                                                                                                                    | 0%          |
| Sodium 150mg                                                                                                                                                       | 7%          |
| Total Carbohydrate 26g                                                                                                                                             | 9%          |
| Dietary Fiber 1g                                                                                                                                                   | 4%          |
| Total Sugars 13g                                                                                                                                                   |             |
| Includes 13g Added Sugars                                                                                                                                          | 26%         |
| Protein 2g                                                                                                                                                         | 4%          |
| Not a significant source of vitamin D, calcium, iron, and potassium                                                                                                |             |
| *The % Daily Value (DV) tells you how much a nutrient in a serving of food contributes to a daily diet. 2,000 calories a day is used for general nutrition advice. |             |

Ingredients: wheat, sugar, rice, brown rice syrup, whole grain corn, corn starch, salt, malt flavor, vitamins and minerals

A

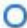

Equal

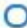

B

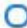

44 Online Supplemental Figure 3. Example of a comparison presented to respondents.

45 (a) Honey Wheat Bread

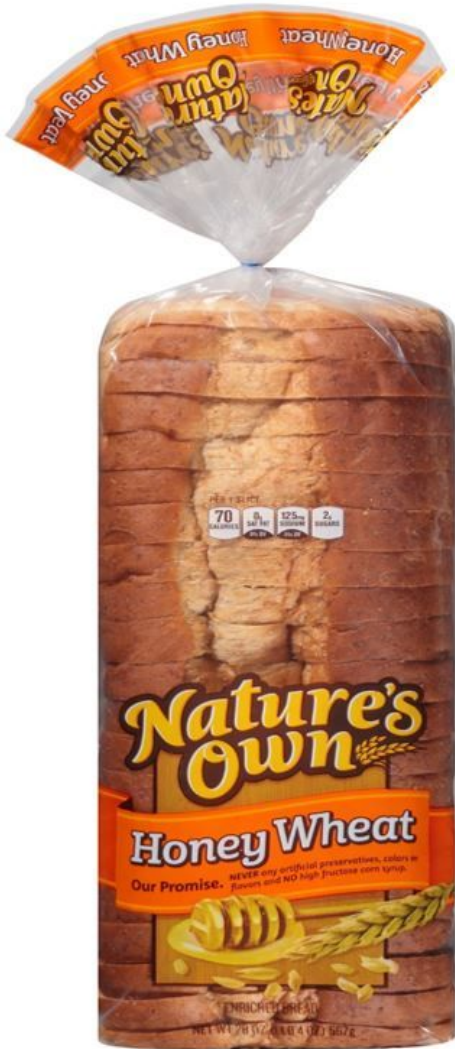

| Nutrition Facts                                                                                                                                                    |               |
|--------------------------------------------------------------------------------------------------------------------------------------------------------------------|---------------|
| 22 servings per container                                                                                                                                          |               |
| Serving size                                                                                                                                                       | 1 slice (26g) |
| Amount Per Serving                                                                                                                                                 |               |
| <b>Calories</b>                                                                                                                                                    | <b>70</b>     |
| % Daily Value*                                                                                                                                                     |               |
| Total Fat 1g                                                                                                                                                       | 1%            |
| Saturated Fat 0g                                                                                                                                                   | 0%            |
| Trans Fat 0g                                                                                                                                                       |               |
| Cholesterol 0mg                                                                                                                                                    | 0%            |
| Sodium 125mg                                                                                                                                                       | 5%            |
| Total Carbohydrate 13g                                                                                                                                             | 5%            |
| Dietary Fiber < 1g                                                                                                                                                 | 3%            |
| Total Sugars 2g                                                                                                                                                    |               |
| Includes 2g Added Sugars                                                                                                                                           | 4%            |
| Protein 3g                                                                                                                                                         | 6%            |
| Not a significant source of vitamin D, calcium, iron, and potassium                                                                                                |               |
| *The % Daily Value (DV) tells you how much a nutrient in a serving of food contributes to a daily diet. 2,000 calories a day is used for general nutrition advice. |               |

Ingredients: Unbleached enriched flour (wheat flour, malted barley flour, niacin, reduced iron, thiamin mononitrate, riboflavin, folic acid), water, honey, sugar, wheat gluten, whole wheat flour, rye flour, wheat bran, contains 2% or less of each of the following: yeast, soy flour, salt, soybean oil, monoglycerides, enzymes, ascorbic acid, cultured wheat flour, vinegar, calcium sulfate, monocalcium phosphate, soy lecithin, calcium carbonate

Which of the following statements best applies to the product in the image?

- All the grain is whole grain
- Half or more than half the grain is whole grain
- Less than half the grain is whole grain
- There is little or no whole grain
- Other

55 (b) Multigrain Cracker

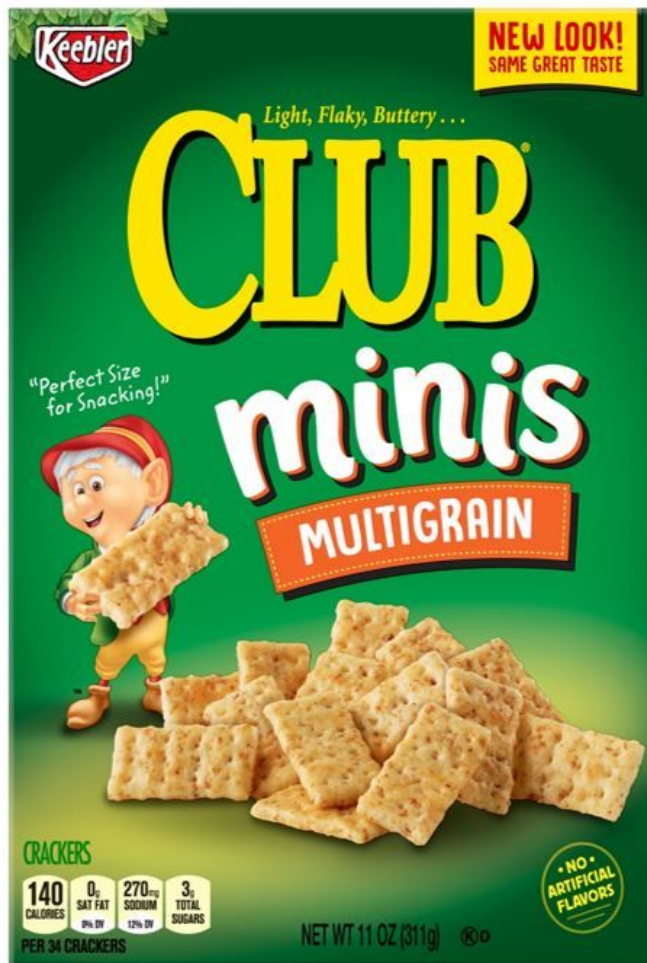

## Nutrition Facts

10 servings per container

Serving size 34 crackers (30g)

Amount Per Serving  
**Calories 140**

|                               | % Daily Value* |
|-------------------------------|----------------|
| <b>Total Fat</b> 6g           | <b>8%</b>      |
| Saturated Fat 0g              | <b>0%</b>      |
| Trans Fat 0g                  |                |
| <b>Cholesterol</b> 0mg        | <b>0%</b>      |
| <b>Sodium</b> 270mg           | <b>12%</b>     |
| <b>Total Carbohydrate</b> 20g | <b>7%</b>      |
| Dietary Fiber < 1g            | <b>2%</b>      |
| Total Sugars 3g               |                |
| Includes 3g Added Sugars      | <b>6%</b>      |
| <b>Protein</b> 2g             | <b>4%</b>      |

Not a significant source of vitamin D, calcium, iron, and potassium

\*The % Daily Value (DV) tells you how much a nutrient in a serving of food contributes to a daily diet. 2,000 calories a day is used for general nutrition advice.

Ingredients: Enriched flour (wheat flour, niacin, reduced iron, vitamin B1 [thiamin mononitrate], vitamin B2 [riboflavin], folic acid), canola oil (with TBHQ for freshness), sugar, modified corn starch, whole wheat flour, toasted defatted wheat germ, whole wheat. Contains 2% or less of oat bran, salt, high fructose corn syrup, leavening (baking soda, sodium acid pyrophosphate, mono-calcium phosphate), corn syrup, degeminated yellow corn flour, soy lecithin

Which of the following statements best applies to the product in the image?

- ☐ All the grain is whole grain
- ☐ Half or more than half the grain is whole grain
- ☐ Less than half the grain is whole grain
- ☐ There is little or no whole grain
- ☐ Other

(c) Apple Cinnamon Oat Cereal

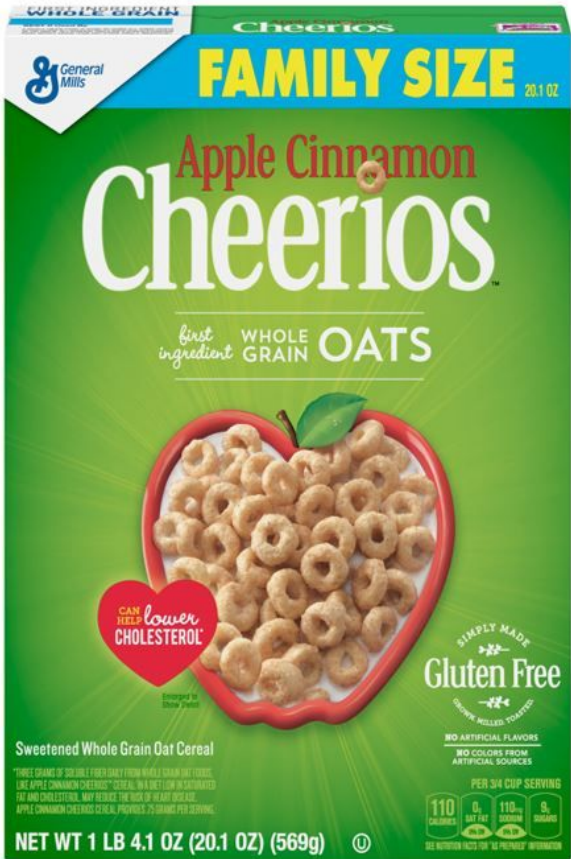

**Nutrition Facts**

|                                                                                                                                                                    |                      |
|--------------------------------------------------------------------------------------------------------------------------------------------------------------------|----------------------|
| 20 servings per container                                                                                                                                          |                      |
| <b>Serving size</b>                                                                                                                                                | <b>3/4 cup (28g)</b> |
| <b>Amount Per Serving</b>                                                                                                                                          |                      |
| <b>Calories</b>                                                                                                                                                    | <b>110</b>           |
| % Daily Value*                                                                                                                                                     |                      |
| <b>Total Fat</b> 1.5g                                                                                                                                              | <b>2%</b>            |
| Saturated Fat 0g                                                                                                                                                   | <b>0%</b>            |
| Trans Fat 0g                                                                                                                                                       |                      |
| <b>Cholesterol</b> 0mg                                                                                                                                             | <b>0%</b>            |
| <b>Sodium</b> 110mg                                                                                                                                                | <b>5%</b>            |
| <b>Total Carbohydrate</b> 22g                                                                                                                                      | <b>8%</b>            |
| Dietary Fiber 2g                                                                                                                                                   | <b>7%</b>            |
| Total Sugars 9g                                                                                                                                                    |                      |
| Includes 9g Added Sugars                                                                                                                                           | <b>18%</b>           |
| <b>Protein</b> 2g                                                                                                                                                  | <b>4%</b>            |
| Not a significant source of vitamin D, calcium, iron, and potassium                                                                                                |                      |
| *The % Daily Value (DV) tells you how much a nutrient in a serving of food contributes to a daily diet. 2,000 calories a day is used for general nutrition advice. |                      |

Ingredients: Whole grain oats, sugar, oat bran, corn starch, corn syrup, canola oil, apple puree concentrate, salt, refiner's syrup, cinnamon, trisodium phosphate. Vitamin E added to preserve freshness

Which of the following statements best applies to the product in the image?

- All the grain is whole grain
- Half or more than half the grain is whole grain
- Less than half the grain is whole grain
- There is little or no whole grain
- Other

81 (d) Farmhouse 12 Grain Bread

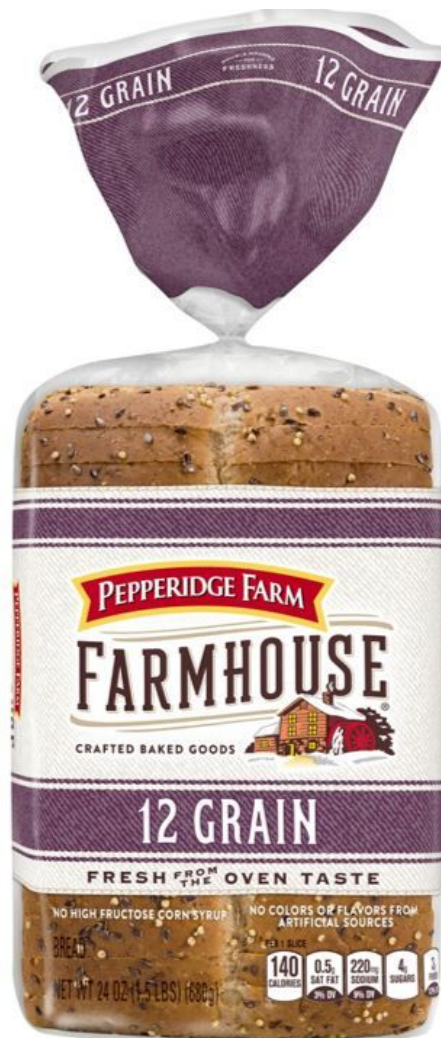

## Nutrition Facts

14 servings per container

**Serving size** 1 slice (49g)

**Amount Per Serving**

**Calories** **140**

|                               | % Daily Value* |
|-------------------------------|----------------|
| <b>Total Fat</b> 2.5g         | <b>3%</b>      |
| Saturated Fat 0.5g            | <b>3%</b>      |
| Trans Fat 0g                  |                |
| <b>Cholesterol</b> 0mg        | <b>0%</b>      |
| <b>Sodium</b> 220mg           | <b>10%</b>     |
| <b>Total Carbohydrate</b> 25g | <b>9%</b>      |
| Dietary Fiber 3g              | <b>11%</b>     |
| Total Sugars 4g               |                |
| Includes 4g Added Sugars      | <b>8%</b>      |
| <b>Protein</b> 5g             | <b>10%</b>     |

Not a significant source of vitamin D, calcium, iron, and potassium

\*The % Daily Value (DV) tells you how much a nutrient in a serving of food contributes to a daily diet. 2,000 calories a day is used for general nutrition advice.

**Ingredients:** Enriched wheat flour (flour, niacin, reduced iron, thiamine mononitrate, riboflavin, folic acid), water, whole wheat flour, sugar, yeast, wheat berries, sunflower seeds, wheat gluten, oat fiber, soybean oil, contains 2% or less of: oats, salt, pearled barley, rye, triticale, corn grit, millet, flaxseed, calcium propionate and sorbic acid to extend freshness, monoglycerides, sodium stearoyl lactylate, flaxseed meal, buckwheat flour, millet flour, brown rice meal, amaranth flour, soy lecithin, whey (milk), citric acid, malted barley flour

82  
83 Which of the following statements best applies to the  
84 product in the image?

- 85 ○ All the grain is whole grain
- 86 ○ Half or more than half the grain is whole grain
- 87 ○ Less than half the grain is whole grain
- 88 ○ There is little or no whole grain
- 89 ○ Other

90 Online Supplemental Figure 4. Product images and survey questions for WG content of 4 actual products

91
